# Supplementary material for: Health and ecological risk of heavy metals in agricultural soils related to Tungsten mining in Southern Jiangxi Province, China
Source: PeerJ. 2024 Apr 1;12:e17200. doi: 10.7717/peerj.17200 (PMC10993887; doi:10.7717/peerj.17200)
Supplement: Supplemental Information 3 — 8 soil heavy metal concentrations, 7 rice heavy metal concentrations, and 7 soil property factors. 1, 2, 3, 4, 5, and 6 represent different sampling points in six sites. [file peerj-12-17200-s003.xlsx]

## Sheet: Heavy metal in soil
	As	Cd	Cu	Zn	Pb	Cr	Mo	W
1	15.7	0.241	35.98	103.8	40.5	75.25	9.734	117.7
1	18.1	0.516	38.24	110	28.3	83.28	6.015	54.17
1	19.2	0.577	35.9	101.3	52.6	73.02	9.291	136.2
1	37.2	0.733	43.76	108.1	62.8	72.47	19.09	113.8
1	28.6	0.19	25.56	69.2	31.1	64.53	3.63	69.52
1	42.5	0.252	29.12	81.1	46.3	73.07	6.05	46.81
1	151	0.1	34.11	45.4	21.1	99.2	1.667	14.2
1	32.7	0.158	28.64	69	25.6	70.15	5.027	77.42
1	29	0.296	28.82	84.5	28.9	77.77	2.643	130.9
1	35.1	0.635	41.31	101.6	50.2	76.98	10.52	87.44
1	18.7	0.179	27.58	88.3	40.5	68.87	4.023	100.6
1	22.6	0.66	45.19	121.9	76.5	73.47	11.62	123.4
2	31.2	0.433	50.96	120.3	125.7	47.74	23.25	290.1
2	54.99	1.044	60.68	122	94.7	45.94	33.11	346.6
2	42.5	0.843	66.45	150	141.7	60.67	25.84	430.6
2	26.9	0.363	32.93	83.6	43	79.53	3.795	80.6
2	23.7	0.197	29.74	65.5	38.2	85.37	5.976	24.81
2	34.9	0.504	42.01	110.7	63.6	68.97	6.964	102.4
2	45.1	1.506	79.03	188.3	109.6	73.28	23.26	177.1
2	86.2	1.94	104.3	222	120.1	94.36	32.38	168.8
2	59.6	1.497	57.9	136.3	95	21.83	52.29	215.9
2	23.2	0.365	49.13	104.1	75.4	57.25	13.07	176.9
2	49.1	1.19	55.97	214.7	93.2	74.02	25.68	238.6
2	71.6	1.041	61.3	148.7	83.3	87.15	14.07	102.1
2	40	0.743	55.3	125.4	73.5	67.63	12.54	101.1
2	26.5	0.366	38.5	103	57.6	66.94	6.721	63.97
2	25.6	0.505	49.24	122.4	74.6	71.23	9.694	94.57
2	64.9	3.855	55.9	289.1	74.5	75.88	8.112	128.1
2	29.1	2.169	33.05	199.8	63.2	68.76	4.035	68.71
2	38.4	0.663	30.41	117.4	72.9	66.67	3.751	125.9
3	10.6	0.159	21.2	47.5	21.4	47.55	3.373	8.31
3	25.4	0.326	42.9	111.7	69.4	80.89	31.59	165
3	117	3.35	110.4	242.6	139	61.01	39.57	293.6
3	58.7	0.711	57.54	134.7	109	61.88	28.78	257.9
3	13.6	0.114	24.82	57.5	24.3	71.05	0.927	11
3	6.86	0.078	21.87	52.8	29.8	51.87	0.492	4.3
3	9.5	0.103	17.24	52.4	14.2	48.47	0.865	7.09
3	20.5	0.152	18.91	45	34.3	57.05	1.386	9.82
3	11.5	0.177	22.11	52.1	23.3	57.33	1.355	27.3
3	10.1	0.201	31.45	71.9	57	65.62	1.548	107.9
4	18.2	0.225	37.83	100	45.4	76.16	3.178	36.66
4	20.2	0.378	45.97	124.2	36.2	92.34	5.905	18.5
4	25	0.249	34.7	89.7	37.5	67.04	5.501	34.2
4	26.2	0.268	36.26	90.7	38.3	64.63	3.917	23.2
4	35.2	0.348	42.06	97	45	62.53	4.515	80.56
4	51.9	0.433	65.45	149.8	70.4	77.57	5.828	100.4
4	41	0.777	52.88	123.1	75.8	55.98	14.43	130.9
4	70.3	1.62	73.24	162.2	103.9	43.12	32.39	192.4
4	102	2.219	77.77	181.3	104	33.73	36.73	225.9
4	66.2	1.754	82.88	180.9	110	54.71	25.37	240.6
4	12.4	0.174	22.06	50.4	35.5	52.46	1.362	11.4
4	41.1	0.849	43.39	119.1	70.2	71.36	10.38	76.06
4	24.6	0.357	27.94	77.3	48.2	56.43	9.44	55.71
4	37.2	0.614	40.39	110.2	66.3	65.43	9.855	84.47
5	18.6	0.138	28.37	73.7	38.6	75.44	1.575	8.01
5	7.81	0.13	18	54.6	41.1	46.68	1.114	19.1
5	22.5	0.186	28.96	88.9	53.2	60.1	4.416	45.62
5	11.8	0.155	19.01	55.4	41.5	38.79	2.473	37.13
5	72.93	1.79	75.52	174.3	106.9	62.02	21.08	218.8
5	4.93	0.16	19.34	44.6	27.2	50.5	0.663	7
5	3.41	0.117	18.02	37.7	24.4	60.21	0.405	4.24
5	6.13	0.109	21.82	49.1	36.7	62.81	0.633	6.692
6	11.9	0.157	22.94	55.7	22.6	48.05	2.151	28.08
6	19.1	0.187	25.67	68	25.9	51.63	2.555	22.74
6	10.9	0.218	26.23	62.2	34.3	43.67	2.881	21.82
6	32.6	0.548	37.77	97.6	63.8	58.38	7.968	79.3
6	33.9	0.419	26.3	72.4	46.6	45.02	5.248	53.3
6	18.8	0.414	28.65	61.9	35	65.53	2.525	24.17
6	6.23	0.153	18.16	44.3	24.1	53.19	0.314	5.413
6	8.8	0.279	32.27	76.3	38.5	60.81	2.543	13.8
6	20.6	0.145	29.69	83.2	30.9	68.42	2.534	16.8
6	13.2	0.19	22.72	61.8	26	56.17	2.551	12.7
	μg/g	μg/g	μg/g	μg/g	μg/g	μg/g	μg/g	μg/g

## Sheet: Soil porperties
	pH	TOC	K2O	Na2O	CaO	CEC	Fe2O3
1	5.12	2.45	1.759	0.106	0.163	0.046	4.23
1	5.87	2.3	1.688	0.095	0.19	0.061	4.474
1	5.61	2.67	1.864	0.129	0.222	0.072	3.248
1	5.48	2.02	1.837	0.14	0.199	0.046	4.276
1	4.61	1.83	1.469	0.077	0.117	0.041	4.025
1	5.13	2.77	1.671	0.076	0.12	0.07	4.891
1	4.81	1.25	1.431	0.085	0.061	0.046	3.574
1	5.21	1.91	1.293	0.083	0.116	0.074	3.699
1	5.35	2.44	1.456	0.085	0.169	0.091	4.258
1	5.56	2.62	1.741	0.134	0.207	0.06	4.001
1	4.52	3.16	1.58	0.093	0.147	0.065	4.862
1	5.31	2.62	1.772	0.135	0.268	0.068	3.675
2	5.35	1.67	2.553	0.256	0.204	0.033	4.518
2	5.45	0.78	2.596	0.343	0.216	0.042	2.952
2	5.2	1.92	2.567	0.276	0.207	0.054	3.039
2	5	2.14	2.048	0.131	0.201	0.082	2.77
2	5.26	2.99	2.279	0.118	0.173	0.072	3.409
2	5.51	1.94	2.247	0.242	0.277	0.069	3.624
2	5.33	3.55	2.564	0.291	0.254	0.068	3.602
2	5.34	3.44	2.818	0.269	0.253	0.092	3.715
2	6.22	0.02	3.157	0.952	0.334	0.033	3.548
2	5.36	1.67	2.391	0.268	0.243	0.046	4.299
2	5.54	4.47	2.315	0.247	0.321	0.077	4.734
2	5.42	3.54	2.482	0.231	0.245	0.082	4.066
2	5.14	2.33	2.406	0.275	0.264	0.069	3.581
2	5.79	2.08	2.441	0.261	0.276	0.055	3.613
2	5.5	2.93	2.499	0.282	0.254	0.051	2.478
2	4.8	3.91	2.31	0.205	0.204	0.067	3.31
2	5.06	4.25	2.697	0.21	0.221	0.067	2.67
2	5.08	3.57	2.726	0.202	0.178	0.064	2.827
3	5.7	2.14	1.056	0.085	0.271	0.069	3.574
3	5.03	2.6	2.717	0.215	0.267	0.084	3.962
3	5.51	2.11	3.159	0.388	0.278	0.075	2.542
3	5.14	1.81	3.051	0.309	0.209	0.059	2.227
3	4.8	2.14	2.057	0.201	0.143	0.041	2.727
3	4.77	2.34	1.977	0.214	0.159	0.043	2.53
3	4.92	2.14	1.748	0.185	0.15	0.038	2.671
3	4.58	2.64	1.792	0.191	0.19	0.051	3.692
3	5.13	1.94	1.543	0.178	0.163	0.043	3.206
3	3.74	1.98	2.129	0.197	0.173	0.064	3.864
4	4.65	2.34	1.922	0.141	0.233	0.084	3.303
4	5	2.27	1.395	0.187	0.288	0.1	3.182
4	5.13	1.91	1.601	0.145	0.266	0.061	3.122
4	6.67	2.08	1.49	0.129	0.387	0.077	4.313
4	4.95	1.88	1.724	0.145	0.24	0.07	4.657
4	5.41	2.24	2.129	0.156	0.316	0.072	4.371
4	5.13	2.14	2.934	0.332	0.218	0.067	4.267
4	5.97	1.32	3.232	0.382	0.221	0.042	2.545
4	4.97	0.66	3.589	0.452	0.249	0.036	2.582
4	5.01	1.55	2.979	0.38	0.228	0.052	4.364
4	5.84	1.38	2.254	0.2	0.288	0.069	4.672
4	5.42	2.24	2.986	0.272	0.274	0.077	2.512
4	5.1	1.81	2.843	0.293	0.213	0.046	2.673
4	5.36	1.81	2.894	0.296	0.271	0.051	2.189
5	5.4	2.82	2.509	0.167	0.346	0.13	2.413
5	5.58	1.68	2.798	0.227	0.219	0.052	2.717
5	4.23	1.8	3.102	0.268	0.221	0.068	2.159
5	5.09	1.45	3.214	0.313	0.193	0.051	2.193
5	5	2.12	3.022	0.357	0.205	0.067	2.399
5	5.3	1.55	1.795	0.127	0.195	0.073	2.545
5	5.25	1.55	1.796	0.103	0.158	0.054	2.582
5	5.01	1.81	2.11	0.137	0.177	0.049	3.364
6	5.32	1.41	1.471	0.136	0.187	0.032	4.172
6	4.95	1.46	1.971	0.263	0.255	0.07	2.623
6	4.97	3.01	2.162	0.286	0.279	0.09	2.243
6	5.3	2	3.026	0.297	0.214	0.041	2.889
6	5.6	0.78	3.075	0.333	0.238	0.036	3.013
6	5.18	1.98	2.351	0.11	0.183	0.046	2.457
6	4.73	1.67	1.83	0.119	0.196	0.04	2.976
6	4.87	2.31	2.437	0.282	0.277	0.092	2.592
6	6.08	1.98	1.72	0.119	0.281	0.081	2.999
6	4.98	3.85	1.386	0.112	0.272	0.074	2.865
		%	%	%	%	mol/kg	%

## Sheet: Heavy metal in paddy rice
	As	Cd	Cr	Cu	Mo	Pb	Zn
1	0.237944	0.349456	0.08315	3.706	0.006415	0.0386565	19.94
1	0.196378	0.350023	0.08102	3.904	0.005822	0.0410562	17.53
1	0.101237	0.370773	0.08422	5.313	0.0022932	0.085014	24.357
2	0.146701	1.00097	0.08741	5.618	0.01088	0.0930325	22.7915
2	0.136042	1.19094	0.07088	5.197	0.0042753	0.056322	20.077
2	0.1578	1.35221	0.09246	5.921	0.01309	0.082112	21.245
3	0.098737	0.286847	0.09829	4.305	0.0058333	0.0473445	13.8285
3	0.121525	1.65067	0.09234	5.585	0.006099	0.040438	14.7105
3	0.0745849	0.070909	0.07425	4.158	0.0010347	0.0370815	16.6635
3	0.084305	0.12443	0.06826	4.25	0.0056	0.0347925	17.0075
4	0.0667462	0.80886	0.0704	4.323	0.0016938	0.0411065	17.802
4	0.111584	0.150755	0.06969	3.199	0.0043044	0.0470175	14.9135
4	0.0952792	0.8935	0.06546	4.998	0.0045755	0.0318385	18.76
4	0.124439	1.16566	0.10059	4.378	0.0026123	0.0426815	15.8635
4	0.14043	2.17093	0.09019	5.3	0.0044631	0.0396365	21.084
4	0.0764662	0.219248	0.08417	5.854	0.0008077	0.023154	19.853
4	0.141998	0.666229	0.0738	4.192	0.00239	0.0263955	15.0465
4	0.122244	0.55706	0.07233	5.303	0.01185	0.0396215	16.3365
5	0.0887202	0.059683	0.08943	3.068	0.00055327	0.0149925	15.0915
5	0.0612376	0.250146	0.10227	3.564	0.0011628	0.0325575	13.4895
5	0.0976099	0.055359	0.10089	4.172	0.0014775	0.026802	15.517
5	0.0423312	0.091762	0.10884	4.618	0.0012978	0.0500325	17.832
6	0.0909744	0.379158	0.09102	3.913	0.0036075	0.0382545	15.0075
6	0.139372	0.070269	0.13765	3.008	0.0055988	0.0587815	19.892
6	0.120965	0.330135	0.1153	5.353	0.00731	0.0995045	22.2035
6	0.0870931	1.10239	0.09043	4.406	0.0037795	0.032715	15.646
	μg/g	μg/g	μg/g	μg/g	μg/g	μg/g	μg/g
